# Supplementary material for: Humanoid Identification of Fabric Material Properties by Vibration Spectrum Analysis
Source: MDPI journal article supplement (doi:10.3390/s18061820), 2018-06-05
Supplement: s1 [file s1]

Supplementary Material

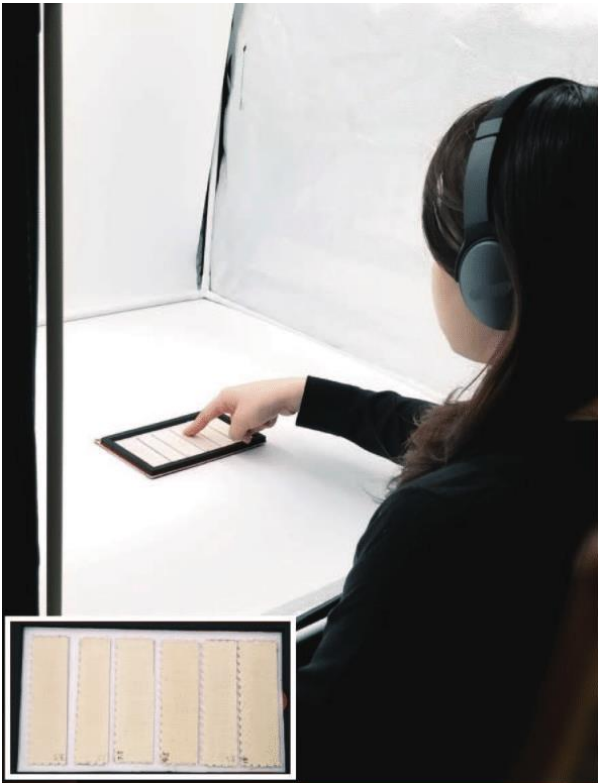

**Figure S1.** A participant exploring a set of stimulus by fingertip in the light tent condition. The inset shows the fabrics stimulus.
